# Supplementary material for: Preparation of a highly crosslinked biosafe dental nanocomposite resin with a tetrafunctional methacrylate quaternary ammonium salt monomer
Source: PubMed Central journal article supplement — RSC Adv. 2019 Dec 16;9(71):41616–27. doi: 10.1039/c9ra09173d (PMC9076464; doi:10.1039/c9ra09173d), 2019-12-16
Supplement: RA-009-C9RA09173D-s001.pdf [file RA-009-C9RA09173D-s001.pdf]

***Supporting Information for***

**Preparation of highly crosslinked biosafe dental nanocomposite resin  
with tetrafunctional methacrylate quaternary ammonium salt monomer**

Weiguo Wang<sup>a,1</sup>, Fan Wu<sup>a,1</sup>, Guoqing Zhang<sup>a</sup>, Sailing Zhu<sup>a</sup>, Jinghao Ban<sup>b</sup>, Limin Wang<sup>a\*</sup>

<sup>a</sup> *Department of Stomatology, NO.903 Hospital of People's Liberation Army, Hangzhou, People's Republic of China*

<sup>b</sup> *School of Stomatology, Fourth Military Medical University, Xi'an, People's Republic of China*

<sup>1</sup> *These two authors contributed equally to this work as co-first authors.*

*\*Correspondence: Limin Wang*

*E-Mail: wlm117@126.com*

## Table of Contents

|                                                                                   |   |
|-----------------------------------------------------------------------------------|---|
| Figure S1. FTIR spectra of dental monomers. ....                                  | 2 |
| Figure S2. FTIR spectra of experimental resins. ....                              | 3 |
| Figure S3. <sup>1</sup> H NMR spectra of TMQA and positions of its protons. ....  | 4 |
| Figure S4. <sup>13</sup> C NMR spectra of TMQA and positions of its protons. .... | 5 |
| Figure S5. Mass spectrum of TMQA. ....                                            | 6 |

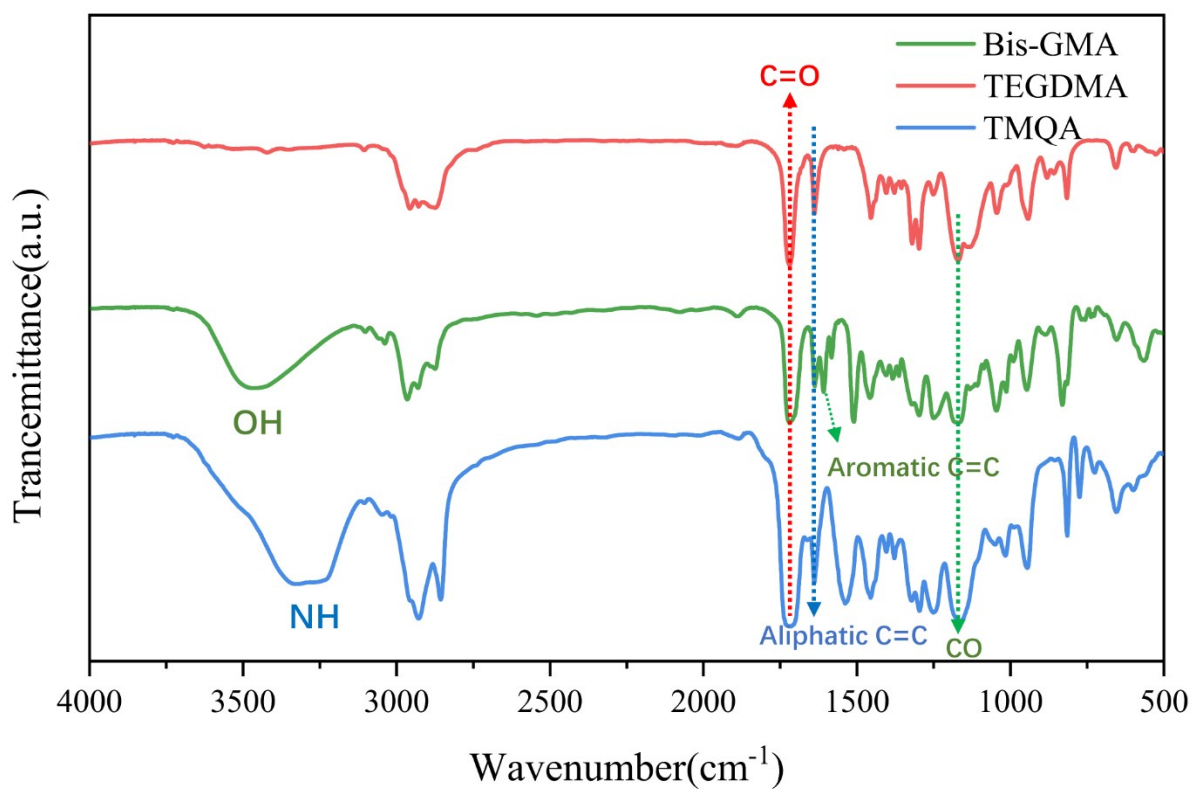

**Figure S1.** FTIR spectra of dental monomers.

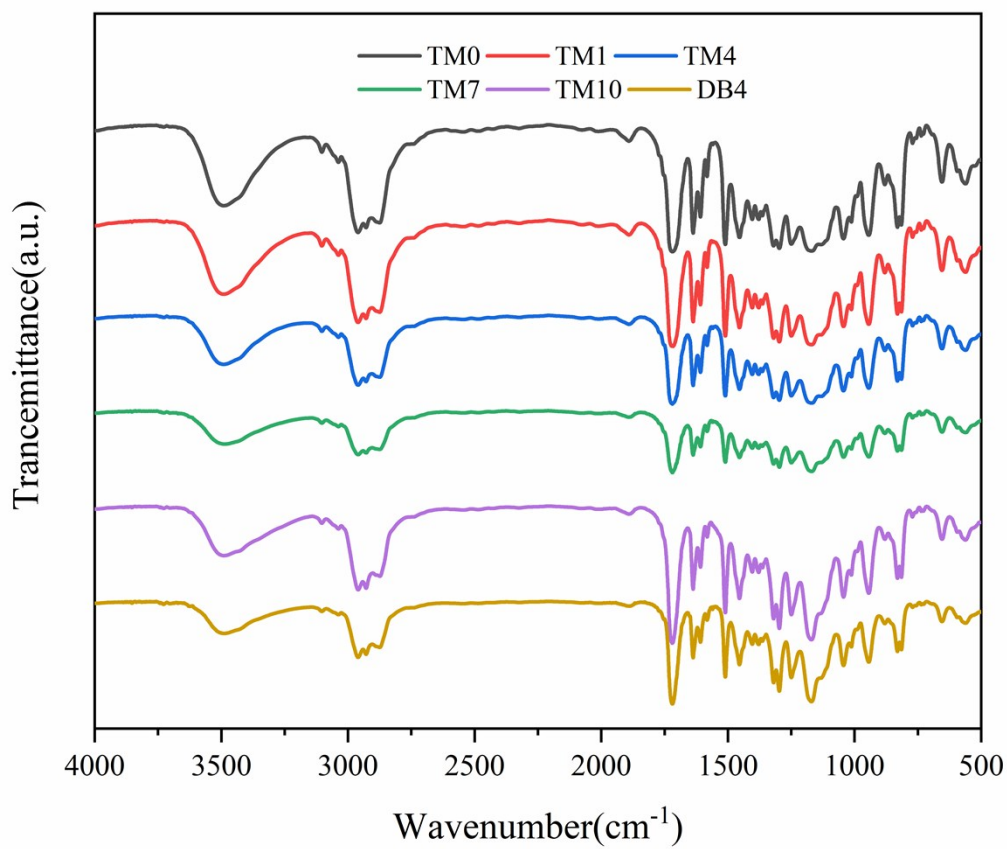

**Figure S2.** FTIR spectra of experimental resins.

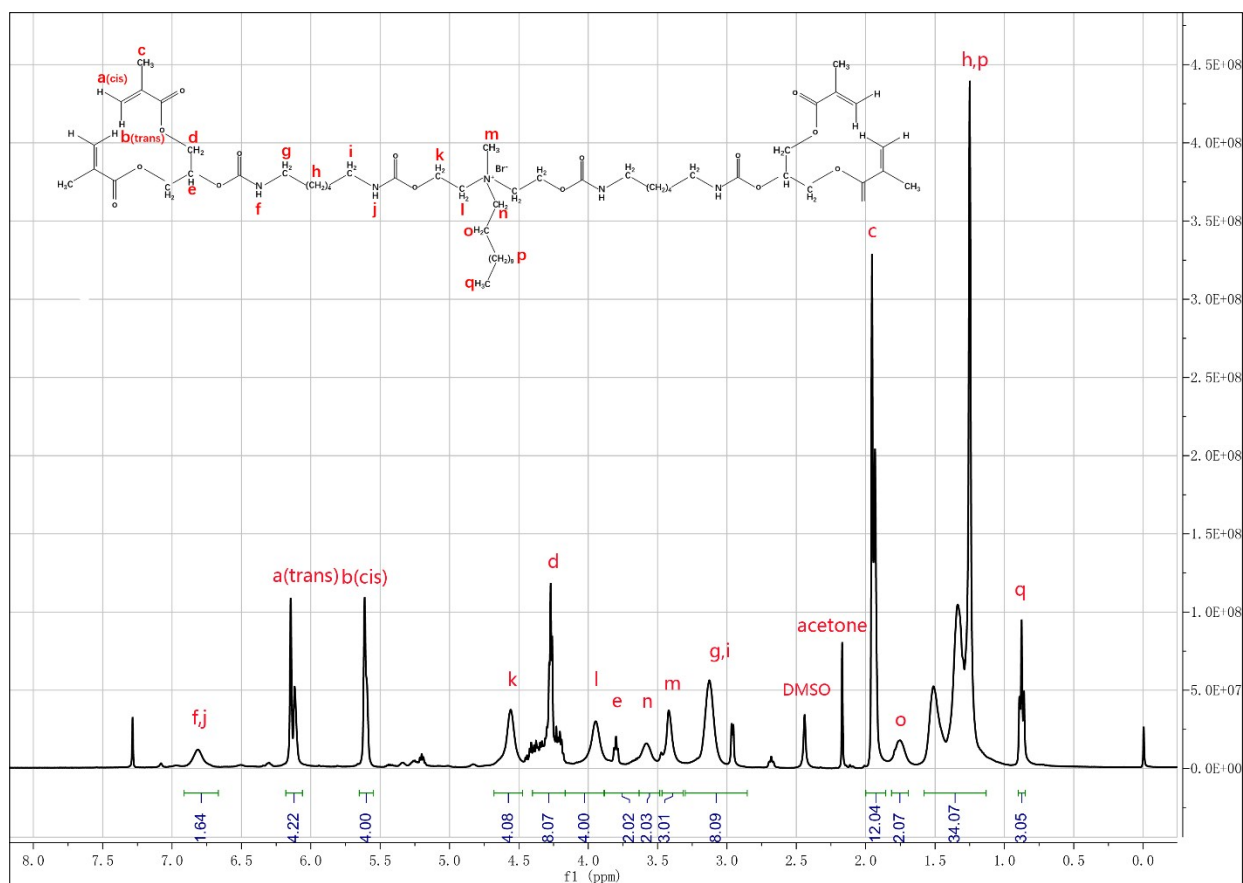

**Figure S3.** <sup>1</sup>H NMR spectra of TMQA and positions of its protons.

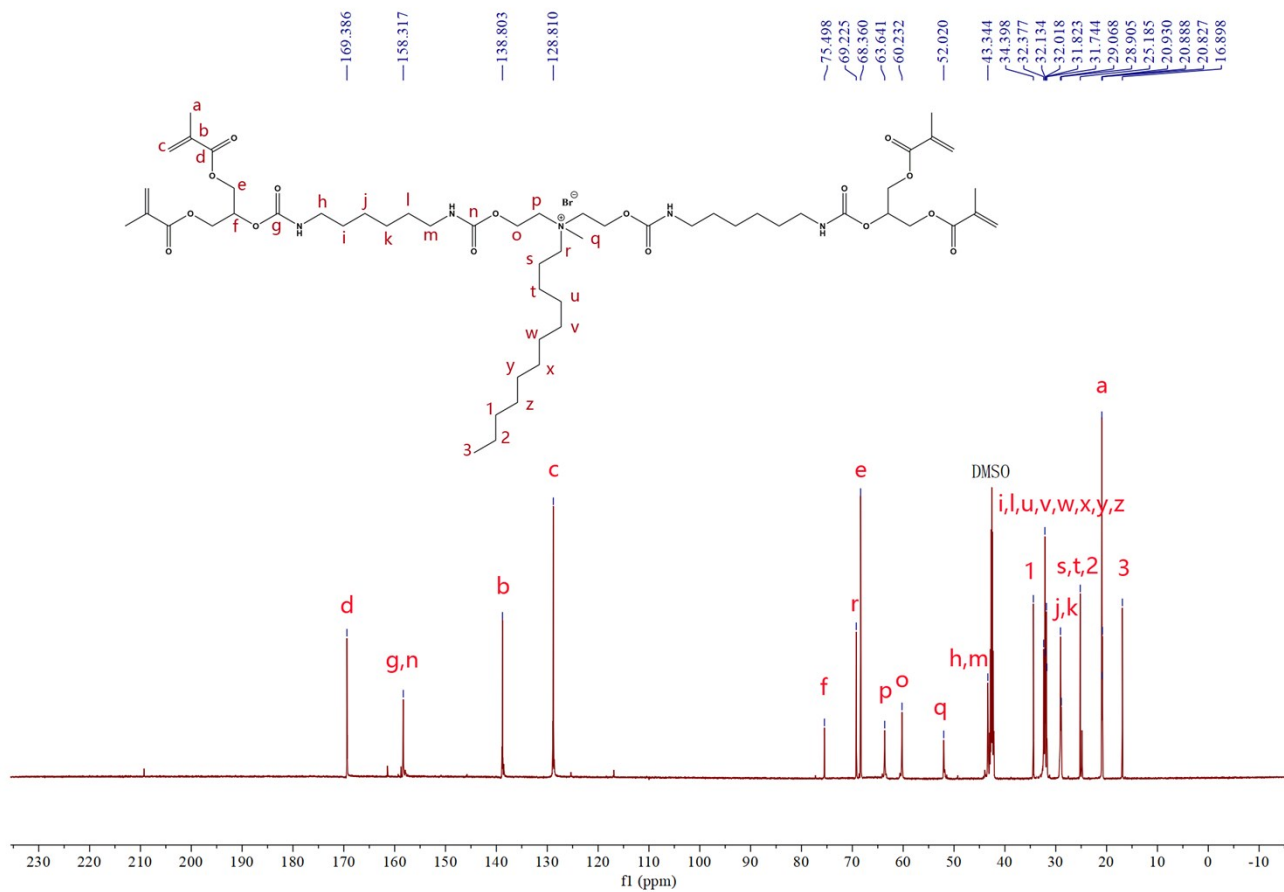

**Figure S4.**  $^{13}\text{C}$  NMR spectra of TMQA and positions of its protons.

# MALDI-TOF Mass Spectrum

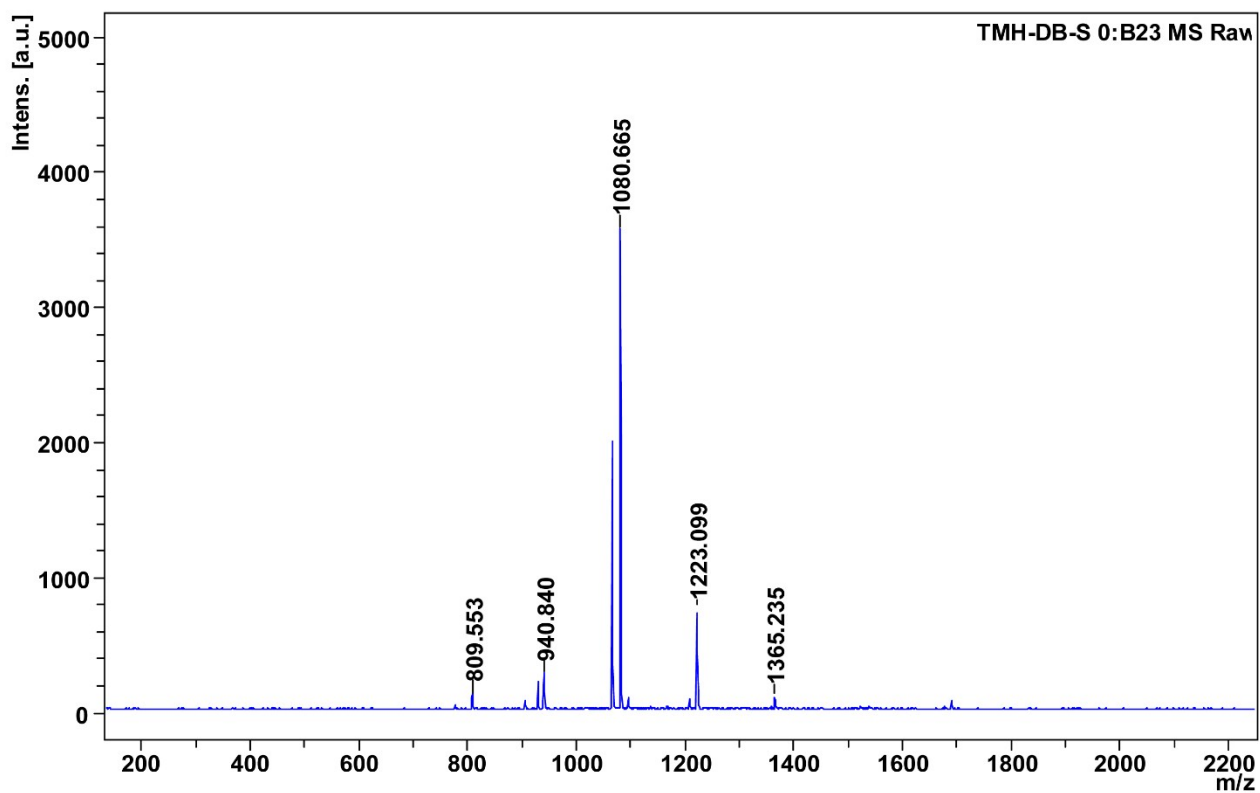

Figure S5. Mass spectrum of TMQA.
